# Supplementary material for: Electron transfer at a distance induced by site-selective photoionization of 2-aminopurine in oligonucleotides and investigated by transient absorption techniques
Source: Royal Society of Chemistry journal article supplement (doi:10.1039/b004896h), 2000-01-01
Supplement: table.doc [file table.doc]

**Supporting Information**

**Electron Transfer at a Distance Induced by Site-Selective Photoionization of 2- Aminopurine in Oligonucleotides and Investigated by Transient Absorption Techniques**

Vladimir Shafirovich, Alexander Dourandin, Weidong Huang, Natalia P. Luneva and Nicholas E. Geacintov

*Chemistry Department and Radiation and Solid State Laboratory, 31, Washington Place, New York University, New York, New York 10003-518*0

In this section we describe in more detail the fluorescence characteristics of the 15-mer double-stranded oligonucleotides containing the 2-aminopurine (2AP) nucleic acid base analog and a GG doublet.

Excitation of free 2AP in aqueous solution generates the well known fluorescence emission spectrum with a maximum at 365 nm.41 However, when incorporated into oligonucleotides, the 2AP fluorescence is significantly quenched by the nucleic acid bases.45-47 In our experiments, the fluorescence quenching efficiencies were characterized by the fluorescence yield ratios *F*(oligo) *F*0-1, where *F*0and *F*(oligo) are the integrated fluorescence signals of free 2AP*r* and 2AP modified oligonucleotides, respectively. In aqueous solutions of the single-stranded 15-mer oligonucleotides, these ratios are ~ 0.1 in the oligonuclotides with the T bridging bases (Table S1). In the single-stranded oligonuclotide with the A bridging bases, the value of *F*(oligo) *F*0-1 ~ 0.17. The smallest value of *F*(oligo) *F*0-1 ~ 0.05 is observed in 18-mer oligonucleotide with 2AP in the middle of the sequence. In double-stranded oligonucleotides, fluorescence quenching is more extensive than in single-stranded molecules, and the *F*(oligo) *F*0-1 values decrease to ~ 0.05 (Table S1). The smallest value of *F*(oligo) *F*0-1 ~ 0.009 is again observed in the 18-mer oligonucleotide with 2AP in the middle of the sequence. These effects of sequence are in agreement with previous observations.45-47 However, we note that we did not observe the distance- dependent quenching of the fluorescence of 2AP by guanines in double stranded DNA as reported in different sequence contexts by Kelley and Barton.31

Table S1. Fluorescence yield ratios *F*(oligo) *F*0-1 in double- and single-stranded oligonuclotides, relative to he fluorescence yield of 2AP in aqueous solution (1.00). X = TAAC; Y = CTACAAC.

| Sequence | Relative Fluorescence Yields | |
| --- | --- | --- |
|  | ssDNA | dsDNA |
| 5'-**[2AP]**T14-3' | 0.12 | 0.057 |
| 5'-**[2AP]GG**T12 -3' | 0.07 | 0.039 |
| 5'-**[2AP]**T**GG**T11-3' | 0.11 | 0.053 |
| 5'-**[2AP]**T2**GG**T10-3' | 0.11 | 0.057 |
| 5'-**[2AP]**T3**GG**T9-3' | 0.11 | 0.052 |
| 5'-**[2AP]**T4**GG**T8-3' | 0.10 | 0.054 |
| 5'-**[2AP]**A4**GG**A8-3' | 0.17 | 0.072 |
| 5'-X**GG**ATTC**[2AP]**Y-3' | 0.05 | 0.009 |
